# Supplementary material
Source: PubMed Central journal article supplement (PMC3105756)
Supplement: NIHMS264446-supplement-s6-9.pdf [file NIHMS264446-supplement-s6-9.pdf]

Supplement 6. Cytokine

|        | MG <sub>C4-2</sub> vs MG <sub>RWV</sub> | Pt1-C vs Pt1-N | Pt4-C vs Pt4-N | Pt5-C vs Pt5-N | HS27A <sub>C4-2</sub> vs HS27A <sub>RWV</sub> |
|--------|-----------------------------------------|----------------|----------------|----------------|-----------------------------------------------|
| BMP1   | +                                       | +              | +              | +              | +                                             |
| BMP2   | +                                       | -              | +              | +              | +                                             |
| BMP6   | +                                       | N/A            | +              | +              | +                                             |
| BMP7   | +                                       | +              | +              | +              | +                                             |
| BMP8B  | +                                       | +              | +              | +              | +                                             |
| CSF1   | +                                       | N/A            | +              | N/A            | N/A                                           |
| CSF2   | +                                       | N/A            | +              | -              | +                                             |
| FLT3LG | +                                       | -              | -              | +              | +                                             |
| GDF3   | +                                       | N/A            | +              | -              | +                                             |
| IFNA14 | -                                       | N/A            | -              | -              | N/A                                           |
| IFNA4  | -                                       | N/A            | -              | N/A            | N/A                                           |
| IFNB1  | +                                       | N/A            | +              | N/A            | N/A                                           |
| IL11   | +                                       | +              | +              | EVEN           | +                                             |
| IL1B   | +                                       | +              | +              | -              | +                                             |

|          |     |     |   |      |   |
|----------|-----|-----|---|------|---|
| IL26     | +   | +   | + | +    | + |
| IL6      | -   | +   | - | +    | + |
| IL8      | -   | +   | + | N/A  | + |
| INHBA    | N/A | +   | - | +    | + |
| PDGFA    | +   | N/A | + | N/A  | + |
| THPO     | +   | N/A | + | N/A  | + |
| TNFSF12  | +   | +   | - | +    | + |
| TNFSF13B | +   | +   | - | +    | + |
| VEGFB    | +   | +   | - | EVEN | + |
|          |     |     |   |      |   |

Supplement 7. Chemokine and receptors

|       | MG <sub>C4-2</sub> vs MG <sub>RWV</sub> | Pt1-C vs Pt1-N | Pt4-C vs Pt4-N | Pt5-C vs Pt5-N | HS27A <sub>C4-2</sub> vs HS27A <sub>RWV</sub> |
|-------|-----------------------------------------|----------------|----------------|----------------|-----------------------------------------------|
| BDNF  | +                                       | +              | +              | -              | +                                             |
| CCL11 | +                                       | -              | +              | +              | N/A                                           |
| CCL15 | +                                       | -              | -              | +              | +                                             |
| CCL2  | -                                       | +              | -              | +              | +                                             |
| CCL21 | +                                       | +              | +              | -              | +                                             |
| CCL25 | +                                       | +              | +              | -              | +                                             |
| CCL28 | +                                       | N/A            | +              | +              | N/A                                           |
| CCL5  | +                                       | N/A            | N/A            | N/A            | +                                             |
| CCL7  | +                                       | +              | -              | +              | +                                             |
| CMTM3 | +                                       | -              | EVEN           | EVEN           | +                                             |
| CMTM4 | +                                       | +              | +              | -              | -                                             |
| CMTM6 | +                                       | +              | +              | -              | -                                             |
| CMTM7 | +                                       | +              | -              | +              | +                                             |
| CMTM8 | +                                       | +              | N/A            | N/A            | +                                             |

|          |   |   |   |      |     |
|----------|---|---|---|------|-----|
| CXCL1    | - | + | + | +    | +   |
| CXCL12   | + | + | - | +    | -   |
| CXCL16   | + | - | + | +    | +   |
| CXCL5    | + | + | + | -    | +   |
| ECGF1    | + | + | + | +    | +   |
| GPR2     | + | + | + | +    | N/A |
| GPR31    | + | + | + | +    | N/A |
| HIF1A    | + | + | + | -    | +   |
| NFKB1    | + | + | + | -    | +   |
| SCYE1    | + | + | + | EVEN | +   |
| TNFRSF1A | + | - | - | +    | +   |
| VHL      | + | + | - | +    | +   |

Supplement 8. Tissue array study of the expression of tenascin, versican and osteonectin prostate cancer and benign tissues.

|                                               | Tenascin                    |                   | Versican                    |                       | Osteonectin                |                  |
|-----------------------------------------------|-----------------------------|-------------------|-----------------------------|-----------------------|----------------------------|------------------|
|                                               | Number                      | Percentage        | Number                      | Percentage            | Number                     | Percentage       |
| <b>Cancer-associated stroma</b>               | (++) 20<br>(+) 36<br>(-) 41 | 20%<br>37%<br>43% | (++) 11<br>(+) 34<br>(-) 43 | 12.5%<br>38.5%<br>49% | (++) 8<br>(+) 17<br>(-) 70 | 8%<br>18%<br>74% |
| <b>Benign-associated stroma (BPH)</b>         | (++) 0<br>(+) 0<br>(-) 11   | 0%<br>0%<br>100%  | (++) 0<br>(+) 1<br>(-) 10   | 0%<br>9%<br>91%       | (++) 2<br>(+) 0<br>(-) 9   | 18%<br>0%<br>88% |
| <b>Normal prostate stroma</b>                 | (++) 0<br>(+) 6<br>(-) 85   | 0%<br>7%<br>93%   | (++) 0<br>(+) 21<br>(-) 70  | 0%<br>23%<br>77%      | (++) 8<br>(+) 8<br>(-) 75  | 9%<br>9%<br>82%  |
| <b>PIN</b>                                    | (++) 0<br>(+) 1<br>(-) 3    | 0%<br>25%<br>75%  | (++) 0<br>(+) 1<br>(-) 3    | 0%<br>25%<br>75%      | (++) 0<br>(+) 0<br>(-) 4   | 0%<br>0%<br>100% |
| <b>Inflammation and atrophy</b>               | (++) 4<br>(+) 28<br>(-) 8   | 10%<br>70%<br>20% | (++) 0<br>(+) 11<br>(-) 29  | 0%<br>27%<br>73%      | (++) 0<br>(+) 4<br>(-) 34  | 0%<br>10%<br>90% |
| <b>Ejaculatory duct &amp; seminal vesicle</b> | (++) 0<br>(+) 2<br>(-) 3    | 0%<br>40%<br>60%  | (++) 0<br>(+) 2<br>(-) 3    | 0%<br>40%<br>60%      | (++) 0<br>(+) 1<br>(-) 2   | 0%<br>33%<br>67% |
| <b>Total tissue stained</b>                   | <b>228</b>                  |                   | <b>228</b>                  |                       | <b>234</b>                 |                  |

Each tissue was examined at 3 loci to confirm the expression of these proteins. (-) indicates no staining in all 3 views, (+) indicates one out of three was positive and (++) showed two or all were all positively stain. Scoring of these tissues was done by two pathologists from the Department of Pathology, Emory University School of Medicine

**Positive**

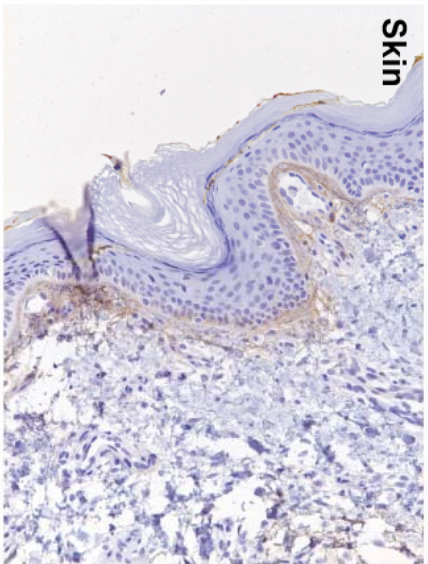

**Prostate Cancer**

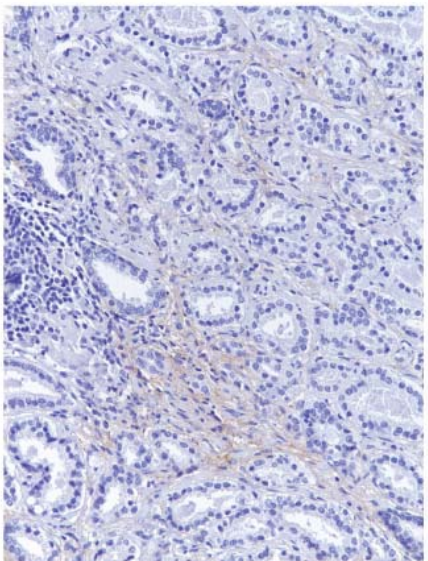

**Benign Prostate**

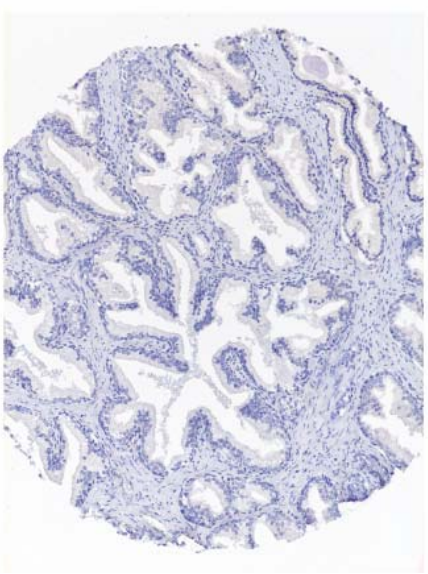

**Tenascin**

**Versican**

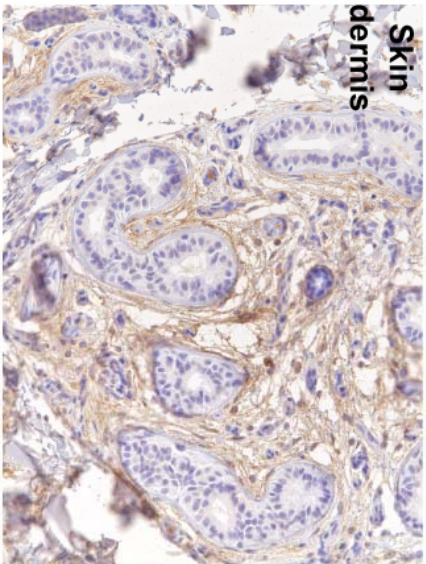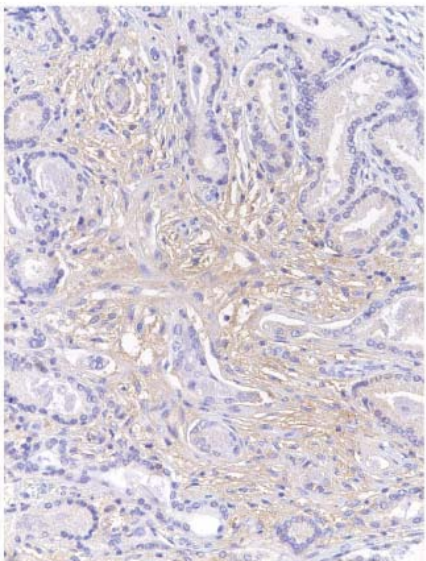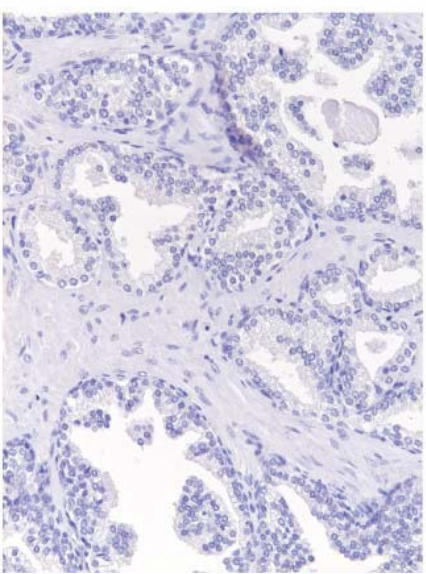

**Nerve bundle**

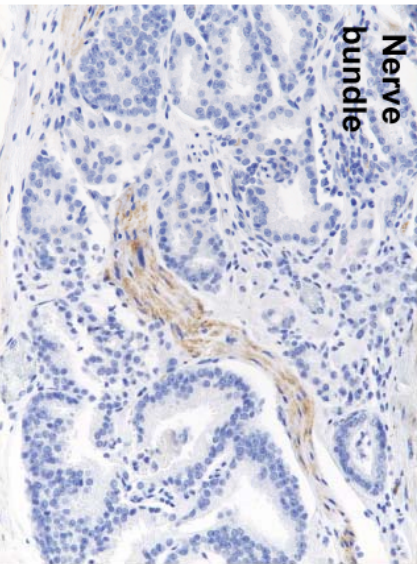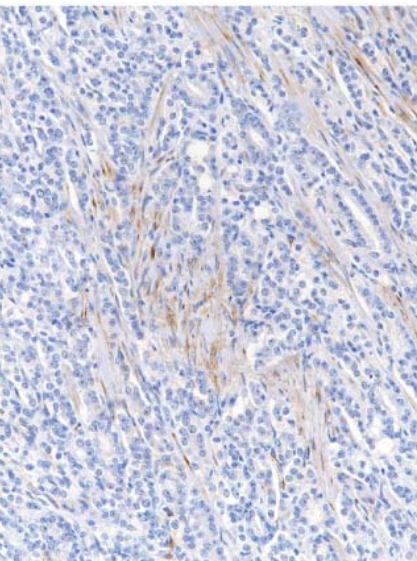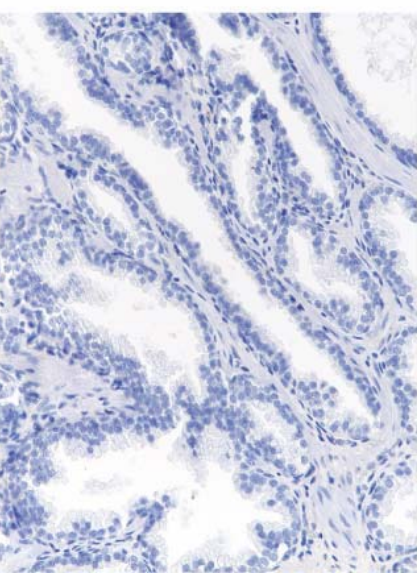

**Onsteonectin**
